Ganglberger et al.  
Functional neuroanatomy from genes

# 1 Predicting functional neuroanatomical maps from 2 fusing brain networks with genetic information

3 Florian Ganglberger<sup>1</sup>, Joanna Kaczanowska<sup>2</sup>, Josef M. Penninger<sup>3</sup>, Andreas Hess<sup>4</sup>, Katja  
4 Bühler<sup>1\*</sup> and Wulf Haubensak<sup>2\*</sup>

5 <sup>1</sup>VRVis Research Center, Donau-City Strasse 1, 1220 Vienna, Austria

6 <sup>2</sup>Research Institute of Molecular Pathology (IMP), Vienna Biocenter (VBC), Dr. Bohr-Gasse  
7 7, 1030 Vienna, Austria

8 <sup>3</sup>Institute of Molecular Biotechnology of the Austrian Academy of Sciences (IMBA), Vienna  
9 Biocenter (VBC), 1030 Vienna, Austria

10 <sup>4</sup>Institute of Experimental and Clinical Pharmacology and Toxicology, Friedrich-Alexander  
11 University Erlangen-Nuremberg, Fahrstrasse 17, 91054 Erlangen, Germany

12 \*To whom correspondence should be addressed.  
13

## 14 Summary

15 **A central aim, from basic neuroscience to psychiatry, is to resolve how genes control**  
16 **brain circuitry and behavior. This is experimentally hard, since most brain functions**  
17 **and behaviors are controlled by multiple genes. In low throughput, one gene at a time,**  
18 **experiments, it is therefore difficult to delineate the neural circuitry through which**  
19 **these sets of genes express their behavioral effects. The increasing amount of publicly**  
20 **available brain and genetic data offers a rich source that could be mined to address this**  
21 **problem computationally. However, most computational approaches are not tailored to**  
22 **reflect functional synergies in brain circuitry accumulating within sets of genes. Here,**  
23 **we developed an algorithm that fuses gene expression and connectivity data with**  
24 **functional genetic meta data and exploits such cumulative effects to predict**  
25 **neuroanatomical maps for multigenic functions. These maps recapture known**  
26 **functional anatomical annotations from literature and functional MRI data. When**  
27 **applied to meta data from mouse QTLs and human neuropsychiatric databases, our**  
28 **method predicts functional maps underlying behavioral or psychiatric traits. We show**  
29 **that it is possible to predict functional neuroanatomy from mouse and human genetic**  
30 **meta data and provide a discovery tool for high throughput functional exploration of**  
31 **brain anatomy *in silico*.**

## 32 Introduction

33 The wealth of data from brain initiatives and the increasing amount of functional genetic  
34 information creates opportunities to mine these resources for insights into the genetic and  
35 neuronal organization of brain function and behavior. Recent studies correlated brain gene  
36 expression maps with structural information to enhance our understanding of genetic and  
37 anatomical parcellations of the brain (1, 2) and its functional networks (3). These studies have  
38 been used, for instance, to explore development and physiological regulation of structural  
39 connectivity and extract functional networks *in silico* (Supplementary Note 1). Collectively,

Ganglberger et al.  
Functional neuroanatomy from genes

40 these results suggest that functional genetic information, brain gene expression data and  
41 connectomes can be successfully used for functional exploration of the brain (Supplementary  
42 Fig. 1).

43 Here, we mine these resources to understand how genes control behavior. A major challenge  
44 in this regard is that behaviors are inherently multigenic and, consequently, identifying the  
45 neural networks through which these gene sets interact to express that function is not trivial.  
46 Discovery tools that give computational predictions would provide an ideal entry point into  
47 this problem.

48 Most established approaches that map genetic information to brain data relate gene co-  
49 expression correlation of functionally grouped genes with structural connectivity (2–5).  
50 Correlative analysis primarily dissects brain organization based on the similarities of regional  
51 gene expression (Supplementary Note 1). It primarily reflects transcriptomic similarities,  
52 globally or for subsets of genes, but it is not tailored to directly predict functional synergies  
53 accumulating over multiple genes. Motivated by this methodological gap, we sought to  
54 develop algorithms that fuse genetic information (sets of functionally related genes) with  
55 brain data to generate functional neuroanatomical maps underlying a given brain function or  
56 behavior *in silico*.

57  
58 We hypothesize that functional synergies of gene sets are best reflected in their cumulative  
59 weights on higher order features of structural (connectomes) or functional (resting state) brain  
60 networks. Based on this, we developed a method that generates functional neuroanatomical  
61 maps of functionally related gene sets from literature meta-analyses or genetic databases. We  
62 demonstrate that cumulative gene expression reflects those functional synergies. Calculating  
63 the effects of cumulative gene expression on different network measures (6, 7) proved to be  
64 sufficient for predicting functional neuroanatomy of multigenic brain functions and behavior.  
65 When applied to gene sets from genome wide association studies, quantitative trait loci  
66 (QTL) analyses or neurogenetic databases, these calculations allowed to predict brain circuits  
67 underlying complex behavioral traits in mice and human.

## 68 **Results**

69 The method was developed on the Allen Mouse Brain Atlas (AMBA) gene expression and  
70 connectivity data framework (8, 9), a widely used mouse brain database. The mouse brain is  
71 currently the most advanced template for integrated network studies of mammalian brains  
72 with extensive gene expression and connectomic information available (8, 9). However, the  
73 method as such is general and can be applied straight forward to data from any other species  
74 such as human. The code has been optimized for low cost parallel computing.

75 Specifically, our method employs genetic-functional associations as inputs for weighting  
76 brain data. We fused a set of genes associated with a given brain function or behavior with  
77 gene expression maps and connectome (as structural brain network) (Fig. 1). We define the  
78 input set  $\mathbf{T}$  of genes out of a genome-wide set  $\mathbf{G}$ . The spatial brain gene expression data is  
79 imported pre-aligned to a common reference space from AMBA. The gene expression data  
80 consists of ordered lists of gene expression densities (10) retrieved from the AMBA for a set  
81 of spatial grid positions  $\mathbf{D} = \{d_i\}_{i=1..n}$  and stored as gene expression density volumes  $\mathbf{D}(\mathbf{T})$  and  
82  $\mathbf{D}(\mathbf{G})$ . Gene expression density is not location invariant. For example, cortical and thalamic  
83 areas have a higher mean gene expression density than the rest of the brain. Spatial bias  
84 introduced by this variance was compensated by the standardization (Z-Score) of

Ganglberger et al.  
Functional neuroanatomy from genes

85 **D(T)** genome-wide, such that expression density distributions at every spatial position are  
86 standard-normal distributed over **G**. Subsequently, these data sets were standardized in their  
87 spatial distribution pattern to adjust for differences between genes within the overall brain  
88 expression density.

89 Next, we sought to determine the cumulative genetic weight of **T** in **D** and calculated the  
90 synergy **S**, defined as the trimmed mean of the normalized **D** for all genes in set **T**. Trimming  
91 reduced sampling artifacts in gene density maps, like image artifacts that appear as outliers  
92 with high density scores (e.g. air bubbles) (11). The functional relation between genes and  
93 neuroanatomy is expressed by weighting either incoming or outgoing connections of every  
94 spatial sample point by **S**. Given the directed AMBA connectome as a connectivity  
95 matrix  $\mathbf{C} \in \mathbf{R}^n \times \mathbf{R}^n$  (where rows represent source regions, and columns target regions), an  
96 incoming- or outgoing-weighted connectome is defined as the row- or column-wise  
97 multiplication of **C** by **S**. To account for higher order synergies within functional maps, we  
98 computed those maps from incoming and outgoing node strengths as local network measures  
99 (12) in the weighted connectomes. For statistical evaluation, we compared the position-  
100 wise node strength measures to randomly drawn gene sets (n=1000) from the genome-wide  
101 set **G** by t-tests (Fig. 1). We adjusted the False Discovery Rate (FDR) of the p-values with the  
102 Benjamini-Hochberg (13) method. The results in this paper are all significant under a FDR  
103 <5% (unless indicated otherwise). Ultimately, these operations generated a p-value map (a p-  
104 value for every sampling position) for every effect and brain function. To add structural  
105 context, these maps were combined (minimum p-value of effects) and projected onto the  
106 connectome, building structural networks of functionally weighted nodes that are functionally  
107 related to the input gene set. A detailed description can be found in the Supplementary  
108 Experimental Procedures.

109 To assess if this computational approach allows to identify function-specific brain circuitry,  
110 we focused on several well-studied gene sets, for which functional associations and  
111 functional neuroanatomy are comprehensively documented: genes associated with  
112 dopaminergic signaling, social behavior, feeding, hypothalamic–pituitary–adrenal (HPA)  
113 stress axis and synaptic plasticity. With these gene sets, we recaptured known functional  
114 neuroanatomy from literature.

115 For instance, genes associated with social behavior recapitulated their known functional  
116 neuroanatomy (Fig. 2A, Supplementary Data 1) (14–20). Similarly, we were able to pick up  
117 the functional neuroanatomy (Supplementary Data 3 Case 1-10A,B,C, Supplementary Data 1)  
118 for other functionally-associated gene sets (Supplementary Data 3 Case 1-10D) including  
119 dopamine (DA) signaling, which revealed the classical DA reward VTA-ACB pathway and  
120 also motor-related connections like SN-GP (21–24). The method allowed detecting the  
121 known feeding-related neuroanatomy based on genes associated with feeding, like orexin,  
122 neuropeptide Y (NPY), Agouti related protein (AgRP), proopiomelanocortin (POMC),  
123 melanocortin or leptin receptors (25–28). Different stress and fear/anxiety-related genes  
124 accumulate in the HPA axis, areas involved in control and regulation of stress and brain  
125 regions involved in processing fear/anxiety (29–34). We also investigated gene sets for  
126 synaptic plasticity, learning and memory. As expected, these genes highlight major sites of  
127 behavioral and functional plasticity in the brain (e.g., cortex, hippocampus, amygdala) (35–  
128 44).

129 To assess these predictions quantitatively, we collected the ground truth in form of network  
130 nodes representing regions functionally associated with these 10 gene sets from literature

Ganglberger et al.  
Functional neuroanatomy from genes

131 (Supplementary Data 2). We calculated the  $F_1$ -score (45) of precision and recall for a binary  
132 classification of the ordered voxel-wise p-values. We used this with first order network  
133 measures (expression site; genetic weight at the node itself) and second order network  
134 measures (incoming/outgoing node strength from/to nodes with accumulated genetic weight,  
135 as well as Hub score, Authority score, Closeness, Betweenness, and Eigencentrality) (Fig.  
136 2B). The computational predictions correlated significantly with the known functional  
137 neuroanatomy from literature (Fig. 2B, *bottom*, right bar), indicating that our method  
138 assembles meaningful functional neuroanatomical maps from genetic data.

139 The predictive power increased from first order measures (Fig. 2B, *bottom*, middle bar) to  
140 second order measures (Fig. 2B, *bottom*, right bar). This indicates that second order network  
141 measures detected regions not identified by gene expression alone, yet are integrated within  
142 the same neuroanatomical map. Results for node strength showed that the prediction accuracy  
143 was superior to other network measures, and is therefore sufficient for further analysis.  
144 Importantly, our approach is calculated at 100  $\mu\text{m}$  voxel resolution, free from *a priori*  
145 constraints from anatomical annotations and fully compatible with small rodent MRI. Thus, it  
146 is suitable to refine structure-function relationships beyond neuroanatomical scales and has  
147 the potential to identify additional nodes and subdivisions within predefined anatomical  
148 regions with possible distinct physiological functions.

149 To further support our findings, we overlaid computed functional maps with those obtained  
150 experimentally with fMRI. Important in the context of this paper, pain data offers the  
151 possibility to link genetics with actual fMRI (46–48) in mice. In fact, for the pain-related  
152 gene sets (Supplementary Note 2, Supplementary Table 3 and Supplementary Data 3 Case  
153 11-30d), the *in silico* predicted functional maps in mouse brain were reproducing large  
154 portions of the functional neuroanatomy observed with Blood-Oxygen-Level-Dependent  
155 functional magnetic resonance imaging (BOLD fMRI data, warped onto the AMBA reference  
156 space by optimized ANTS (49) parametrization) *in vivo* (Fig. 3A, b). This further  
157 substantiates the validity of our approach. While our method seemed to fit best with sets of  
158  $>4$  genes (Supplementary Fig. 2), predictions were also informative at the single-gene level.  
159 Functional imaging data of *Cacna2d3* mutants, a highly conserved pain gene, revealed altered  
160 thalamo-cortical connectivity and synesthesia after thermal stimulation in mutant mice (50).  
161 The predicted maps computed from *Cacna2d3* alone (Fig. 3A, *top right*) recaptured pain  
162 functional neuroanatomy from fMRI (Fig. 3A, *bottom left*, 3B) and pain maps that are  
163 affected by this gene (Fig. 3A, *bottom right*, Fig. 3B). Nevertheless, the single gene  
164 operations will depend heavily on the gene itself, and so we recommend to use gene sets for  
165 the most efficient and accurate functional neuroanatomy integration.

166 Based on these results, we explored yet unknown or only partially described effector  
167 networks of behavioral traits investigated in genetic screens or association studies. One of the  
168 challenges is that behavioral traits are largely multigenic and identifying the neural circuitry  
169 through which these traits are expressed is difficult. We expanded our analysis on pain and  
170 included fear/anxiety and autism spectrum disorder (ASD) gene sets (Supplementary Note 2)  
171 from publically available databases and published meta-studies (Supplementary Table 3). In  
172 some cases, large gene sets were clustered using the DAVID platform to parcellate them into  
173 functional category-linked subsets, and so in those cases genes are not only related by the  
174 analyzed trait, but also regarding sub-functions annotated in the database. When supplied  
175 with these gene sets, our computational method extracted meaningful functional maps  
176 (Supplementary Data 3 Case 11-30). These maps, of which node-wise comparisons are in line  
177 with their functional annotation from literature, give a comprehensive representation of

Ganglberger et al.  
Functional neuroanatomy from genes

178 functional genetic synergies underlying the respective trait (Fig. 4A, green squares).  
179 Interestingly, we also identified nodes so far not clearly linked to investigated functions,  
180 therefore extracting potential functional elements (Fig. 4A, blue squares). These nodes  
181 might be part of the same functional network and participate in shaping the internal states of  
182 the mammalian brain.

183 Extending our approach to human template based on resting state networks from fMRI (as  
184 functional brain networks) demonstrated that the methodology can be generalized to other  
185 species. Cross-validation with the meta-studies (Supplementary Data 4, Supplementary Table  
186 2) reveals similar findings for both (Fig. 4A,b), demonstrating its versatility for functional  
187 exploration of the human brain in health and disease *in silico*.

## 188 Discussion

189 We have developed a computational method to integrate genetic, gene expression and  
190 connectomic information from brain and genomic initiatives for rapid functional exploration  
191 of the brain *in silico*. We found that, in the brain, functionally related genes are not  
192 distributed at random but assemble into specific maps, which recapitulate functional  
193 anatomical annotations or functional data from fMRI. Cumulative effects, from expression  
194 sites alone (Fig. 2B, red bar), reflect functional synergies within functionally related genes,  
195 which are not directly fitted by transcriptomic similarities, usually derived from correlative  
196 analysis (Supplementary Note 1). The predictions further improved by second order network  
197 measures, which incorporate functional synergies of local gene expression that manifest in  
198 the context of higher-order interactions within the brain architecture. Incoming/Outgoing  
199 node strength (Fig. 2B, green bar) performed best, but not significantly better than Hubs &  
200 Authorities or Eigencentality. This implies that nodes with the strongest effect on the  
201 network are either primary expression sites, or source/target sites thereof. Betweenness and  
202 Closeness, indicators of shortest paths in networks, outlined small distinctive nodes, that are  
203 part of functional neuroanatomy, but failed to predict the entirety of functional  
204 neuroanatomical annotations (explaining the seemingly random  $F_1$ -score in Fig. 2B). The  
205 ground truth in its entirety might naturally be best explained by node strength, which reflects  
206 compounded functional synergies of regions and their afferent and efferent connections.  
207 Taken together, by fusing cumulative gene expression and best-fit network measures, we  
208 provide an optimized tool that reliably predicts functional neuroanatomical maps from  
209 genetic information.

210 When applied to gene sets from behavioral genetics, we demonstrated that our workflow can  
211 extract putative effector network nodes as functional brain maps which can be used to explore  
212 trait-specific circuitries. These explorations allowed to refine known functional  
213 neuroanatomy (Fig. 4, green squares). For instance, the anatomy of thalamo-cortical  
214 connections in pain processing can be dissected to fine anatomical resolution (e.g.,  
215 Supplementary Data 3 Case 11E, red arrows, note layer specificity) which could not be  
216 achieved with fMRI (Fig. 3A, wt). The method extracted a specific and strong connection  
217 between PVT and central amygdala (Supplementary Data 3 Case 21E, red arrows).  
218 Interestingly this connection recently emerged as central element in fear control (51, 52).  
219 Similarly, for ASD, we identified many cortico-cortical connections (Supplementary Data 3  
220 Case 24E,26-29E, red arrows) with prediction accuracy reaching individual layers. Among  
221 similar lines, the method uncovered circuitry within regions functionally not yet associated  
222 with specific traits (Fig. 4, blue squares). For instance, the functional association of visual  
223 cortex with pain processing (53), motor cortex with startle response (54) and hypothalamic

Ganglberger et al.  
Functional neuroanatomy from genes

224 circuitry in autism (55), whose roles are understudied in the context of the respective trait or  
225 psychiatric condition, specifically at the fine anatomical or circuit level.

226 This can be particularly useful to pursue studies of causative role of genetic variance linked  
227 to mental diseases with unknown ethiopathology or complex course/symptomatology (with  
228 e.g., gene associations in GWAS studies as input). The method provides a holistic description  
229 of the functional neuroanatomy of a given gene set related to a meta study or behavioral trait.  
230 As such, it allows to rank order the most promising candidate regions. It has the potential to  
231 refine the functional parcellation of the brain beyond anatomical resolution, especially when  
232 performed with multiple functionally grouped gene sets at large scales. Importantly, the  
233 candidate nodes, in particular those previously not associated with those conditions, can serve  
234 as promising entry points for functional circuit dissection, e.g., with opto- and  
235 pharmacogenetic methods.

236 The functional relation underlying our study can be exploited to associate gene sets with  
237 specific brain functions or brain functions with specified gene sets (Supplementary Fig. 1).  
238 Importantly, our strategy applies to other neural systems (beyond mouse and human) for  
239 which genetic information, gene expression maps and connectomes are, or will be, available  
240 and allows exploration of functional brain organization in cases where actual functional data  
241 is difficult, if not impossible, to obtain.

## 242 **Acknowledgments**

243 W. H. was supported by a grant from the European Community's Seventh Framework  
244 Programme (FP/2007-2013) / ERC grant agreement no. 311701, the Research Institute of  
245 Molecular Pathology (IMP), Boehringer Ingelheim and the Austrian Research Promotion  
246 Agency (FFG).

## 247 **Author Contributions**

248 F.G., J.K. and W.H. conceived the method. F.G implemented the method, performed data  
249 analysis and the quantitative validation. J.K performed the qualitative validation. J.P. and  
250 A.H. provided fMRI data. F.G., J.K., A.H., K. B. and W.H. wrote the manuscript. K.B. and  
251 W.H. jointly supervised the project.

## 252 **Competing Financial Interests**

253 The authors declare no competing financial interests.

Ganglberger et al.  
Functional neuroanatomy from genes

254 **References**

- 255 1. French L, Pavlidis P (2011) Relationships between gene expression and brain wiring in  
256 the adult rodent brain. *PLoS Comput Biol* 7(1).
- 257 2. French L, Tan PP, Pavlidis P (2011) Large-Scale Analysis of Gene Expression and  
258 Connectivity in the Rodent Brain: Insights through Data Integration. *Front*  
259 *Neuroinform* 5:12.
- 260 3. Richiardi J, Altmann A (2015) Correlated gene expression supports synchronous  
261 activity in brain networks. *Science (80- )* 348(6240):11–14.
- 262 4. Rubinov M, Ypma RJF, Watson C, Bullmore ET (2015) Wiring cost and topological  
263 participation of the mouse brain connectome. *Proc Natl Acad Sci* 112(32):201420315.
- 264 5. Whitaker KJ, et al. (2016) Adolescence is associated with genomically patterned  
265 consolidation of the hubs of the human brain connectome. *Proc Natl Acad Sci* 113 (32  
266 ):9105–9110.
- 267 6. Liska A, Galbusera A, Schwarz AJ, Gozzi A (2014) Functional connectivity hubs of  
268 the mouse brain. *Neuroimage*.
- 269 7. Meunier D, Lambiotte R, Bullmore ET (2010) Modular and hierarchically modular  
270 organization of brain networks. *Front Neurosci* 4(DEC).
- 271 8. Lein ES, et al. (2007) Genome-wide atlas of gene expression in the adult mouse brain.  
272 *Nature* 445(7124):168–176.
- 273 9. Oh SW, et al. (2014) A mesoscale connectome of the mouse brain. *Nature*  
274 508(7495):207–214.
- 275 10. Lee C-K, et al. (2008) Quantitative methods for genome-scale analysis of in situ  
276 hybridization and correlation with microarray data. *Genome Biol* 9(1):R23.
- 277 11. Bindhu P, Krishnapillai R, Thomas P, Jayanthi P (2013) Facts in artifacts. *J Oral*  
278 *Maxillofac Pathol* 17(3):397–401.
- 279 12. Rubinov M, Sporns O (2010) Complex network measures of brain connectivity: Uses  
280 and interpretations. *Neuroimage* 52(3):1059–1069.
- 281 13. Benjamini Y, Hochberg Y (1995) Controlling the False Discovery Rate: A Practical  
282 and Powerful Approach to Multiple Testing. *J R Stat Soc Ser B* 57(1):289 – 300.
- 283 14. Kim Y, et al. (2015) Mapping social behavior-induced brain activation at cellular  
284 resolution in the mouse. *Cell Rep* 10(2):292–305.
- 285 15. O’Connell LA, Hofmann HA (2011) The Vertebrate mesolimbic reward system and  
286 social behavior network: A comparative synthesis. *J Comp Neurol* 519(18):3599–  
287 3639.
- 288 16. Young LJ, Wang Z (2004) The neurobiology of pair bonding. *Nat Neurosci*  
289 7(10):1048–1054.
- 290 17. Young LJ, Young AZM, Hammock EAD (2005) Anatomy and neurochemistry of the  
291 pair bond. *Journal of Comparative Neurology*, pp 51–57.
- 292 18. Leshan RL, Pfaff DW (2014) The hypothalamic ventral premammillary nucleus: A key  
293 site in leptin’s regulation of reproduction. *J Chem Neuroanat* 61:239–247.
- 294 19. Marlin BJ oxytocin enables maternal behaviour by balancing cortical inhibition, Mitre  
295 M, D’amour JA, Chao M V., Froemke RC (2015) Oxytocin Enables Maternal  
296 Behavior by Balancing Cortical Inhibition. *Nature* 520(7548):499–504.
- 297 20. O’Connell L a., Hofmann H a. (2012) Evolution of a Vertebrate Social Decision-  
298 Making Network. *Science (80- )* 336(6085):1154–1157.
- 299 21. Russo SJ, Nestler EJ (2013) The brain reward circuitry in mood disorders. *Nat Rev*  
300 *Neurosci* 14(9):609–625.
- 301 22. Lammel S, Tye KM, Warden MR (2014) Progress in understanding mood disorders:  
302 Optogenetic dissection of neural circuits. *Genes, Brain Behav* 13(1):38–51.

Ganglberger et al.  
Functional neuroanatomy from genes

- 303 23. Bjoerklund A, Dunnett SB (2007) Dopamine neuron systems in the brain: an update.  
304 *Trends Neurosci* 30(5):194–202.
- 305 24. Berridge KC, Kringelbach ML (2015) Pleasure Systems in the Brain. *Neuron*  
306 86(3):646–664.
- 307 25. Betley JN, Cao ZFH, Ritola KD, Sternson SM (2013) Parallel, redundant circuit  
308 organization for homeostatic control of feeding behavior. *Cell* 155(6):1337–1350.
- 309 26. Jennings JH, Rizzi G, Stamatakis AM, Ung RL, Stuber GD (2013) The inhibitory  
310 circuit architecture of the lateral hypothalamus orchestrates feeding. *Science*  
311 341(6153):1517–21.
- 312 27. Hardaway JA, Crowley NA, Bulik CM, Kash TL (2015) Integrated circuits and  
313 molecular components for stress and feeding: Implications for eating disorders. *Genes,  
314 Brain Behav* 14(1):85–97.
- 315 28. Wu Q, Clark MS, Palmiter RD (2012) Deciphering a neuronal circuit that mediates  
316 appetite. *Nature* 483(7391):594–597.
- 317 29. Stoppel C, Albrecht A, Pape HC, Stork O (2006) Genes and neurons: Molecular  
318 insights to fear and anxiety. *Genes, Brain Behav* 5(SUPPL. 2):34–47.
- 319 30. Tovote P, Fadok JP, Lüthi A (2015) Neuronal circuits for fear and anxiety. *Nat Rev  
320 Neurosci* 16(6):317–331.
- 321 31. Herman JP, Cullinan WE (1997) Neurocircuitry of stress: Central control of the  
322 hypothalamo-pituitary-adrenocortical axis. *Trends Neurosci* 20(2):78–84.
- 323 32. Smith SM, Vale WW (2006) The role of the hypothalamic-pituitary-adrenal axis in  
324 neuroendocrine responses to stress. *Dialogues Clin Neurosci* 8(4):383–395.
- 325 33. Carhuatanta K a K, Shea CJ a, Herman JP, Jankord R (2014) Unique genetic loci  
326 identified for emotional behavior in control and chronic stress conditions. *Front Behav  
327 Neurosci* 8:341.
- 328 34. Steimer T (2002) The biology of fear- and anxiety-related behaviors. *Dialogues Clin  
329 Neurosci* 4(3):231–249.
- 330 35. Ressler KJ, Paschall G, Zhou X, Davis M (2002) Regulation of synaptic plasticity  
331 genes during consolidation of fear conditioning. *J Neurosci* 22(18):7892–7902.
- 332 36. Mineur YS, Crusio WE, Sluyter F (2004) Genetic dissection of learning and memory  
333 in mice. *Neural Plast* 11(3-4):217–240.
- 334 37. Toyoda H, et al. (2011) Interplay of amygdala and cingulate plasticity in emotional  
335 fear. *Neural Plast* 2011.
- 336 38. Pisani A, Centonze D, Bernardi G, Calabresi P (2005) Striatal synaptic plasticity:  
337 Implications for motor learning and Parkinson’s disease. *Mov Disord* 20(4):395–402.
- 338 39. Lee Y-S (2014) Genes and signaling pathways involved in memory enhancement in  
339 mutant mice. *Mol Brain* 7(1):43.
- 340 40. Hasan MT, et al. (2013) Role of motor cortex NMDA receptors in learning-dependent  
341 synaptic plasticity of behaving mice. *Nat Commun* 4:2258.
- 342 41. Kirkwood A, Bear MF (1995) Elementary forms of synaptic plasticity in the visual  
343 cortex. *Biol Res* 28:73–80.
- 344 42. Todd TP, Bucci DJ (2015) Retrosplenial Cortex and Long-Term Memory: Molecules  
345 to Behavior. *Neural Plast* 2015.
- 346 43. Castro-Alamancos M a, Donoghue JP, Connors BW (1995) Different forms of  
347 synaptic plasticity in somatosensory and motor areas of the neocortex. *J Neurosci*  
348 15(July):5324–5333.
- 349 44. Iriki A, Pavlides C, Keller A, Asanuma H (1989) Long-Term Potentiation in the Motor  
350 Cortex. *Science* (80- ) 245(4924):1385–7.
- 351 45. Van Rijsbergen CJ (1979) *Information Retrieval, 2nd edition*.
- 352 46. Hess A, Sergejeva M, Budinsky L, Zeilhofer HU, Brune K (2007) Imaging of



Ganglberger et al.  
Functional neuroanatomy from genes

- 353 hyperalgesia in rats by functional MRI. *Eur J Pain* 11(1):109–119.  
354 47. Hess A, et al. (2011) Blockade of TNF-alpha rapidly inhibits pain responses in the  
355 central nervous system. *Proc Natl Acad Sci U S A* 108(9):3731–3736.  
356 48. Heindl-Erdmann C, et al. (2010) Combining functional magnetic resonance imaging  
357 with mouse genomics: new options in pain research. *Neuroreport* 21(1):29–33.  
358 49. Avants BB, Epstein CL, Grossman M, Gee JC (2008) Symmetric Diffeomorphic  
359 Image Registration with Cross-Correlation: Evaluating Automated Labeling of Elderly  
360 and Neurodegenerative Brain. *Med Image Anal* 12(1):26–41.  
361 50. Neely GG, et al. (2010) A Genome-wide Drosophila screen for heat nociception  
362 identifies  $\alpha 2\delta 3$  as an evolutionarily conserved pain gene. *Cell* 143(4):628–638.  
363 51. Do-Monte FH, Quinones-Laracuente K, Quirk GJ (2015) A temporal shift in the  
364 circuits mediating retrieval of fear memory. *Nature* 519(7544):460–463.  
365 52. Penzo MA, et al. (2015) The paraventricular thalamus controls a central amygdala fear  
366 circuit. *Nature* 519(7544):455–459.  
367 53. Gopalakrishnan R, Burgess RC, Plow EB, Floden DP, Machado AG (2015) A  
368 magnetoencephalography study of multi-modal processing of pain anticipation in  
369 primary sensory cortices. *Neuroscience* 304:176–189.  
370 54. Kühn AA, Sharott A, Trottenberg T, Kupsch A, Brown P (2004) Motor cortex  
371 inhibition induced by acoustic stimulation. *Exp Brain Res* 158(1):120–124.  
372 55. Kurth F, et al. (2011) Diminished Gray Matter Within the Hypothalamus in Autism  
373 Disorder: A Potential Link to Hormonal Effects? *Biol Psychiatry* 70(3):278–282.  
374

## Ganglberger et al. Functional neuroanatomy from genes

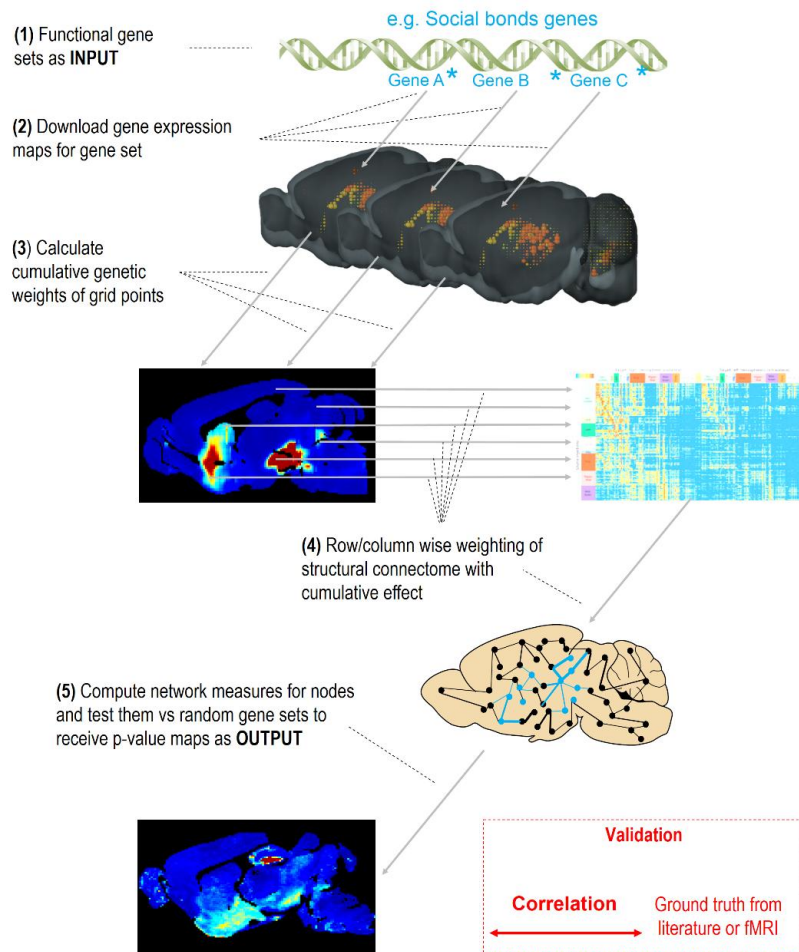

375

376  
377  
378  
379  
380  
381  
382  
383  
384  
385

**Figure 1. Computational workflow.** A functionally-related gene set serves as input (1). For this gene set, gene expression data is retrieved (2), normalized and used to calculate a cumulative genetic effect (3). The cumulative effect is used to weight a structural connectivity matrix column or row wise (4). On the weighted network, network measures are computed and statistically evaluated by t-tests against a null distribution (network measures based on random gene sets) (5). The output is a voxel-wise p-value map for every network measure. The results can be evaluated by computing correlation with ground truth from literature or fMRI.

Ganglberger et al.  
Functional neuroanatomy from genes

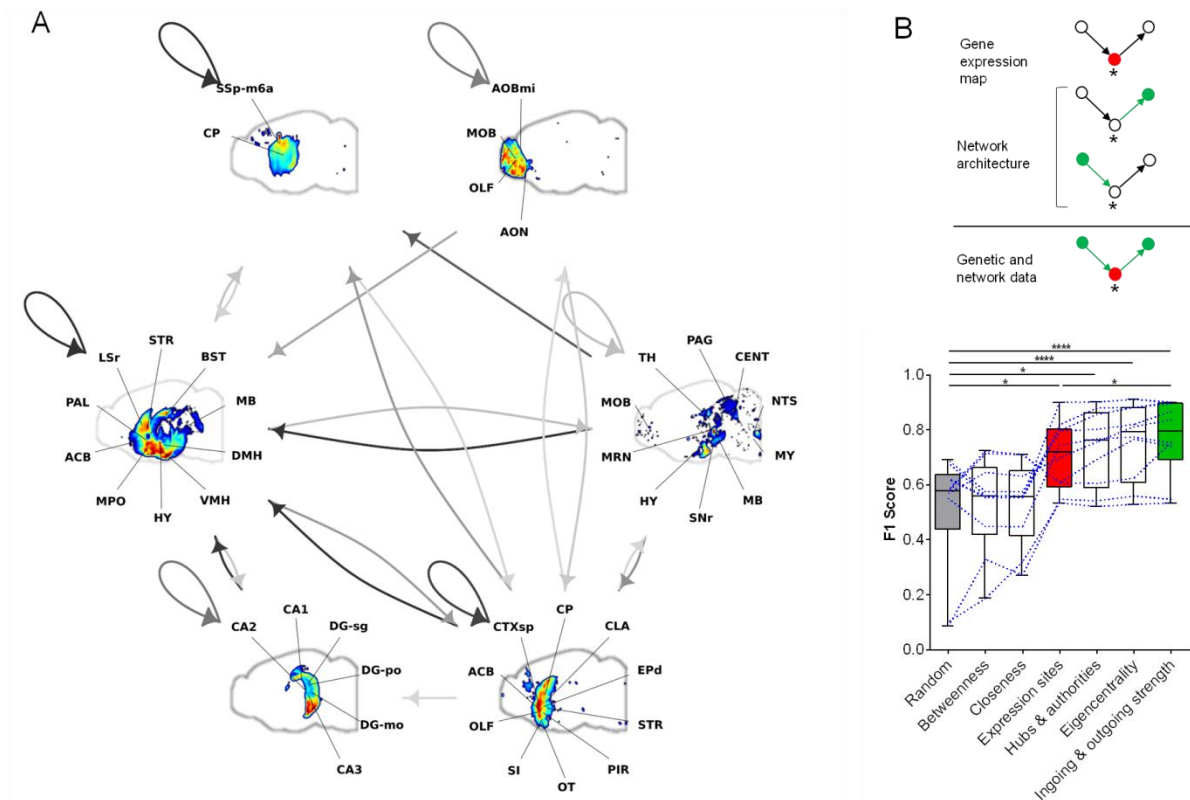

386  
 387 **Figure 2. Recovery of known functional anatomy from test gene sets.** (A) Clustered nodes of a functional  
 388 anatomical map associated with a gene set for social behavior, overlaid with structural connectivity (grey  
 389 arrows). The top-ranked networks include olfactory bulb (MOB), olfactory tubercle (OT), endopiriform nucleus  
 390 (EPd), substantia innominata (SI), hypothalamus (HT) and hypothalamic nuclei (dorsomedial nucleus of the  
 391 hypothalamus (DMH), lateral hypothalamic area (LHA), ventromedial hypothalamic nucleus (VMH)),  
 392 hippocampus (particularly CA2 region), midbrain (MB), including periaqueductal gray (PAG), ventral  
 393 tegmental area (VTA) and nucleus accumbens (ACB). The pseudo-color scale of the nodes (colored voxels)  
 394 indicates the voxel-wise accumulation of genetic weights, the intensity of the edges (arrows) the structural  
 395 strength of the connection between the nodes. Loops indicate within node connections. For a complete list of  
 396 abbreviations see Supplementary Tab. 1. (B) *Top*, Integration of first and second order network measures. The  
 397 asterisk indicates a node with accumulated genetic weight. Red and green indicate sites with increased weight in  
 398 first and second order measures, respectively. *Bottom*, Node-wise comparison of predicted maps to ground truth  
 399 for 10 test sets.  $F_1$ -scores increase from random classification to expression sites and to second order network  
 400 measures significantly (Benjamini & Hochberg corrected One-way ANOVA on ranks, Ingoing & outgoing  
 401 network strength vs Expression sites;  $p < 0.05$ , Ingoing & outgoing network strength vs Random;  $p < 0.0001$ ,  
 402 Expression sites vs Random;  $p < 0.05$ , Eigencentrality vs Random;  $p < 0.0001$ , Hubs & authorities vs Random;  
 403  $p < 0.05$ ). The individual  $F_1$  scores for each prediction are shown as dotted lines. Bars indicate median and  
 404 interquartile range. Incoming/Outgoing node strength, Hubs, Authorities, Closeness, Betweenness and  
 405 Eigencentrality were tested, node strength showed the highest  $F_1$  score.  
 406

Ganglberger et al.  
Functional neuroanatomy from genes

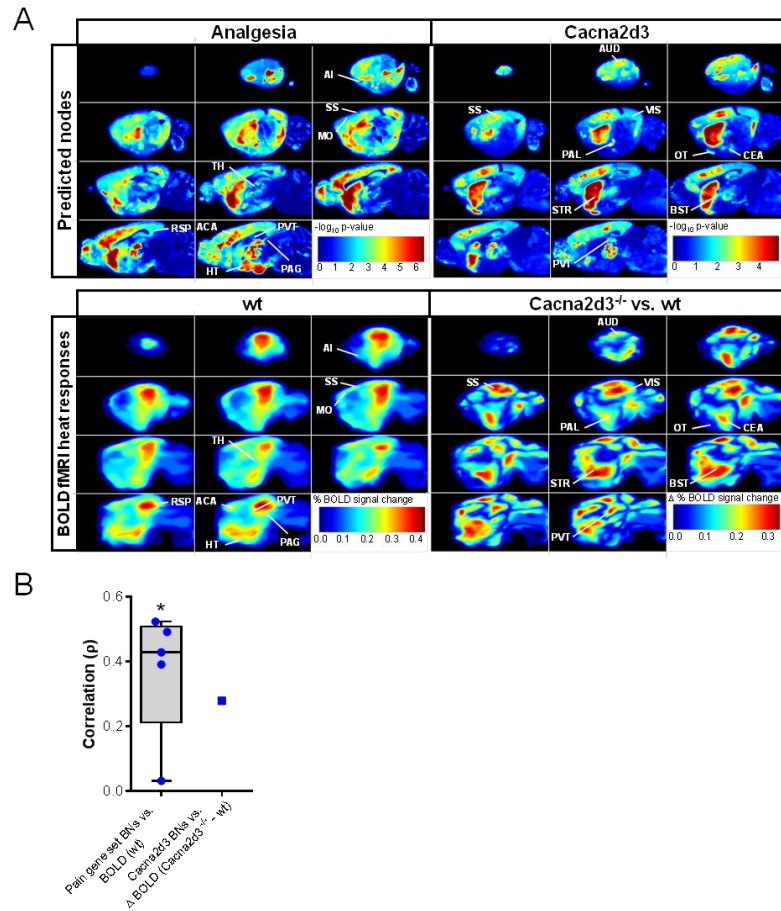

**Figure 3. Computed functional maps correlate with BOLD fMRI of pain-related states.** (A) Similarity of functional maps nodes predicted for analgesia gene sets and *Cacna2d3* gene (*top*) to nodes with heat evoked fMRI responses (*bottom*). The highest ranked nodes include striatum (STR), paraventricular nucleus of thalamus (PVT), bed nuclei of stria terminalis (BST), pallidum (PAL), central amygdalar nucleus (CEA), sensory cortices (somatosensory areas (SS), visual areas (VIS), auditory areas (AUD)) and olfactory tubercle (OT) and correspond to those identified by fMRI. Color bars indicate  $-\log_{10}$ -scaled p-values (*top*) and heat stimulus responses (% BOLD signal changes) in wt animals (*bottom left*) or differences ( $\Delta$ ) in heat responses between *Cacna2d3*<sup>-/-</sup> and wt animals (% BOLD signal changes in *Cacna2d3*<sup>-/-</sup> - % BOLD signal changes in wt animals) (*bottom right*). For a detailed list of brain regions see Supplementary Tab. 1. (B) Voxel-wise Spearman correlations of p-value maps predicted from pain gene sets with BOLD fMRI responses. Bars indicate median and interquartile range of Spearman's  $\rho$ . Wilcoxon signed rank test against  $\rho=0$  ( $n=5$ ,  $W^+(15)=15$ ,  $W(15)=0$ ,  $*p_{\text{one-tailed}} < 0.05$ ).

407

408

409

410

411

412

413

414

415

416

417

418

419

420

421

422

423

424

425

426

427

428

Ganglberger et al.  
Functional neuroanatomy from genes

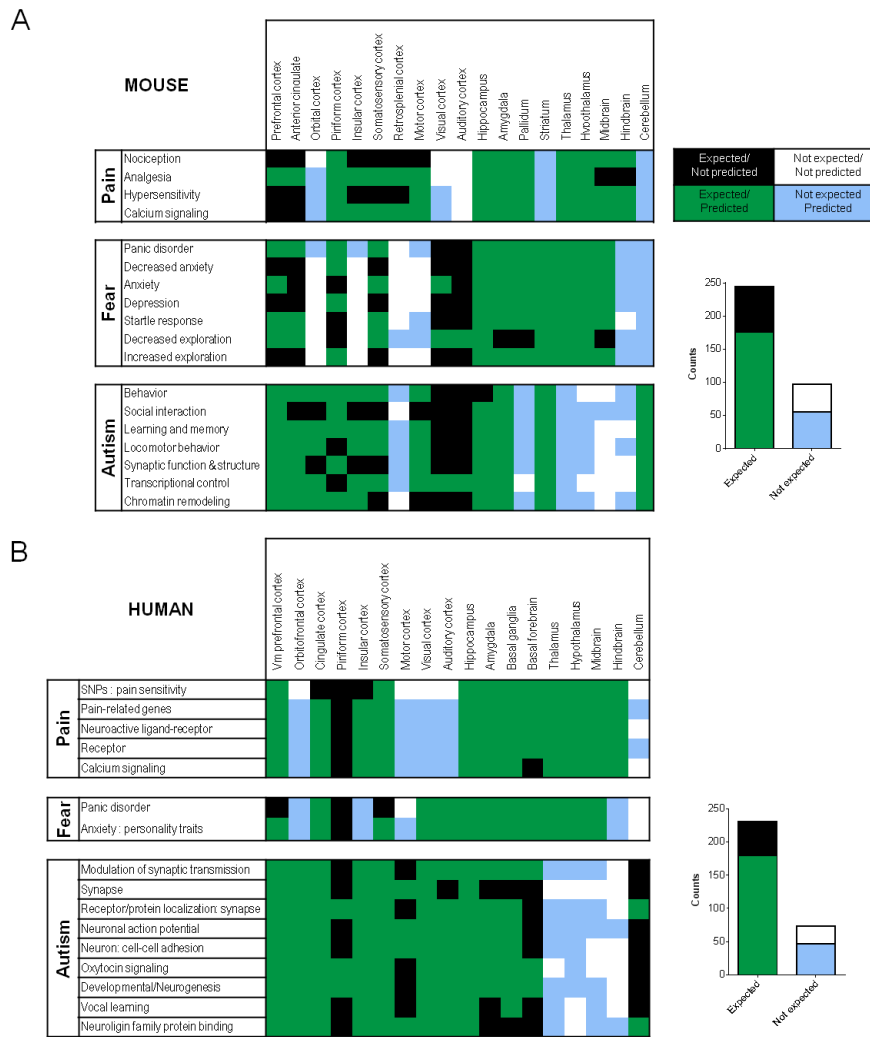

429

430 **Figure 4. Predicting effector functional maps of behavioral traits from**  
 431 **mouse and human genetic meta data. (A) Left, Node-wise comparison of**  
 432 **predicted mouse functional anatomy for pain, fear and autism, divided into**  
 433 **different functional subcategories, to functional neuroanatomical**  
 434 **annotations from literature for the top 100 p-value ranked nodes. Right,**  
 435 **Quantification of the qualitative assessment. There is a significant overlap**  
 436 **between predicted maps and functional neuroanatomical annotation (n=342;**  
 437 **Fisher's exact test, p=0.0121) (B) Left, Node-wise comparison of predicted**  
 438 **human functional anatomy for pain, fear and autism, divided into different**  
 439 **functional subcategories, to functional neuroanatomical annotations from**  
 440 **literature for the top 100 p-value ranked nodes. Right, Quantification of the**  
 441 **qualitative assessment. There is a significant overlap between predicted**  
 442 **maps and functional neuroanatomical annotation (n=288; Fisher's exact**  
 443 **test, p=0.0092).**

444

Ganglberger et al.  
Functional neuroanatomy from genes

445 **Supplementary Information**

446 **Supplementary Figures 1-2.**

447 **Supplementary Data 1.** P-values of first and second order effects for all cases based on  
448 region (mouse and human).

449 **Supplementary Data 2.** Ground truth generated from literature.

450 **Supplementary Data 3.** Functional neuroanatomical maps, significant regions and  
451 network visualization of all cases used in this paper for mouse.

452 **Supplementary Data 4.** Significant regions of all cases used in this paper for human.

453 **Supplementary Table 1.** Anatomical abbreviations.

454 **Supplemental Experimental Procedures**

455 **Mouse Data**

456 The mouse connectome was retrieved as (structural) connectivity from all 2173 available  
457 injection sites (state March 2016) to their target sites given as image data, detailing  
458 projections labeled by rAAV tracers via serial two-photon tomography (9). Those sites are  
459 added up to a connectivity matrix which covers about 15 percent of the right hemisphere as  
460 source regions, and about 100% as target regions. The AMBA connectome (right hemisphere  
461 injections) was mirrored onto (left hemisphere) AMBA gene expression data. In order to also  
462 take weak connections into account, the connectome was binarized by a threshold according  
463 to Oh, S. W. *et al.* (9), Extended Data Figure 7, that minimizes the amount of false positive  
464 connections. The gene expression density is interpolated to a 100 micron resolution to match  
465 the resolution of the connectome. A Matlab script for downloading the gene expression for **T**  
466 and for **G**, as well as the AMBA connectome is provided on request.

467 **Human data**

468 Gene expression by region retrieved from the Allen Human Brain Atlas (56). The Allen  
469 Institute provides an affine transformation to MNI152 (57) space by its API. We used resting  
470 state functional connectivity from the Human Connectome Project (58), which is also in  
471 MNI152space (57).

472 **Mathematical description**

473 Input data is a functionally related gene set, more precisely a certain brain function or  
474 behavioral trait represented as a list of genes. Spatial gene expression and connectomic data  
475 were retrieved from AMBA.

476  
477 Data retrieval was performed via the AMBA API. It allows the download of 3D spatial gene

Ganglberger et al.  
Functional neuroanatomy from genes

478 expression patterns(8) for available genes at given grid positions with a resolution of 200  
479 microns.

480 We retrieve for  $n$  grid positions  $\mathbf{P} = \{\mathbf{p}_i\}_{i=1,\dots,n}$ ,  $\mathbf{p}_i \in \mathbb{R}^3$  and each available gene  $g$  in the mouse  
481 genome  $\mathbf{G} = \{g_j\}_{j=1,\dots,m}$  (or at least a random drawn subset) the gene expression density

$$482 \quad d(\mathbf{p}_i, \mathbf{G}) := d_i(\mathbf{G}) = (d_{i1}, \dots, d_{im}) \quad | \quad i=1, \dots, n$$

483 and store it as gene expression density volume

$$484 \quad \mathbf{D}(\mathbf{G}) = (d_1(\mathbf{G}), \dots, d_n(\mathbf{G}))^T_{i=1..n} = (d_{ij})_{i=1..n, j=1..m} \in \mathbb{R}^{n \times m}$$

485 This is also done for the gene function/trait associated gene set  $\mathbf{T} = \{t_k\}_{k=1,\dots,l}$  being a subset  
486 of  $\mathbf{G}$ , resulting in the expression density volume  $\mathbf{D}(\mathbf{T}) \in \mathbb{R}^{n \times k}$ .

487  
488 Normalization of the function/trait specific expression density volume  $\mathbf{D}(\mathbf{T})$  is performed  
489 over the genomic as well as over the spatial domain. At first, standardization in the genome  
490 space is performed so that every spatial sample point has a distribution of gene expression  
491 densities with a mean of 0 and a standard deviation of 1 over the whole genome  $\mathbf{G}$

$$492 \quad d_{ik}^{\text{gene normalized}} = (d_{ik} - \mu_i) / \sigma_i \quad | \quad \forall d_{ik} \in \mathbf{D}(\mathbf{T})$$

493 where  $\mu_i = \mu((d_{ij})_{j=1,\dots,m})$  and  $\sigma_i = \sigma(d_{ij}((d_{ij})_{j=1,\dots,m}))$ ,  $d_{ij} \in \mathbf{D}(\mathbf{G})$ .

494 This normalization compensated for spatial bias in the mean **density**. For example, the  
495 cerebral cortex and thalamic areas have a higher mean **density** than the rest of the brain.

496 In a second stage, standardization is performed for  $\mathbf{D}^{\text{gene normalized}}(\mathbf{T}) = (d_{ij}^{\text{gene normalized}})$  in the  
497 spatial domain, so that each gene in  $\mathbf{T}$  has a distribution of gene expression densities with a  
498 mean of 0 and a standard deviation of 1 over all sample positions

$$499 \quad d_{ij}^{\text{gene-space normalized}} = (d_{ij}^{\text{gene normalized}} - \mu_j) / \sigma_j \quad | \quad \forall d_{ij}^{\text{gene normalized}} \in \mathbf{D}^{\text{gene normalized}}(\mathbf{T}),$$

$$500 \quad g_j \in \mathbf{T}$$

501 where  $\mu_j^{\text{gene normalized}} = \mu(d_{ik}^{\text{gene normalized}})_{k=1,\dots,l}$  and  $\sigma_j^{\text{gene normalized}} = \sigma(d_{ik}^{\text{gene normalized}})_{k=1,\dots,l}$ ,  $d_{ik}$   
502  $\in \mathbf{D}(\mathbf{T})$ .

503  
504 Effect calculation is based on the trimmed mean of the gene-space normalized density of all  
505 genes in the function/trait set, that is called synergy  $\mathbf{S} = (s(\mathbf{p}_i))_{i=1..n}$  where

$$506 \quad s(\mathbf{p}_i) = \mu_{\text{trimmed}}((d_{ik}^{\text{gene-space normalized}})_{k=1,\dots,l}) \quad | \quad i=1, \dots, n, d_{ik} \in \mathbf{D}(\mathbf{T})$$

507 With the synergy  $\mathbf{S}$ , several effects can be computed. Effects are divided into first order and  
508 second order effects:

509 First order effects do not take the context of the network into account. The synergy  $\mathbf{S}$  is a  
510 first order effect itself, since  $\mathbf{S}$  represents the gene function/trait association of every  
511 sample point. Other first order effects would be the  $\mu((d_{ik}^{\text{gene-space normalized}})_{k=1,\dots,l})$  (which

Ganglberger et al.  
Functional neuroanatomy from genes

512 is not robust to image artifacts like bubbles), or  $\max((d_{ik}^{\text{gene-space normalized}})_{k=1,\dots,l})$   
513  $,((d_{ik}^{\text{gene-space normalized}})_{k=1,\dots,l})$

514 Second order effects show the influence of the function/trait in the context of the  
515 network. The function/trait-network association is expressed by weighting either  
516 incoming or outgoing connections of every sample position by  $\mathbf{S}$ , depending on the  
517 scope of interest (afferent or efferent connections). Given a directed connectome as  
518 connectivity matrix

$$519 \quad \mathbf{C} = (c_{vw})_{v,w=1..n} ; \mathbf{C} \in \mathbb{R}^{n \times n}$$

520 where the rows represent the source regions, the columns target regions, either an  
521 incoming  $\mathbf{C}^{\text{weighted in}}$  or outgoing  $\mathbf{C}^{\text{weighted out}}$  weighted directed connectome is defined as

$$522 \quad \mathbf{C}^{\text{weighted out}} = (c_{vw}^{\text{weighted out}})_{w=1,\dots,n} = s(p_v) * (c_{vw})_{w=1,\dots,n} \quad | \quad \forall v = 1..n$$

$$523 \quad \mathbf{C}^{\text{weighted in}} = (c_{vw}^{\text{weighted in}})_{v=1,\dots,n} = s(p_w) * (c_{vw})_{v=1,\dots,n} \quad | \quad \forall w = 1..n$$

524 The second order effects on the network are computed by local network measures such as  
525 incoming/outgoing node strength, hubs, authorities, closeness, betweenness and  
526 eigencentrality on both incoming and outgoing weighted connectomes  $\mathbf{C}^{\text{weighted in}}$  and  
527  $\mathbf{C}^{\text{weighted out}}$ . We showed in Fig. 2B, that incoming/outgoing node strength performed best on  
528 predicting our test data and is therefore stated exemplary. The incoming node strength (sum  
529 of incoming connections for every node) of  $\mathbf{C}^{\text{weighted in}}$  and  $\mathbf{C}^{\text{weighted out}}$  is defined as

$$530 \quad \mathbf{IN}^{\text{weighted out}} = (\text{in}^{\text{weighted out}}(p_v))_{v=1..n} \text{ where}$$

$$531 \quad \text{in}^{\text{weighted out}}(p_v) = \sum_{w=1}^n c_{vw}^{\text{weighted out}} \quad | \quad \forall v = 1..n$$

$$532 \quad \mathbf{IN}^{\text{weighted in}} = (\text{in}^{\text{weighted in}}(p_v))_{v=1..n} \text{ where}$$

$$533 \quad \text{in}^{\text{weighted in}}(p_v) = \sum_{w=1}^n c_{vw}^{\text{weighted in}} \quad | \quad \forall v = 1..n$$

534 and the outgoing node strength (sum of outgoing connections for every node) as

$$535 \quad \mathbf{OUT}^{\text{weighted out}} = (\text{out}^{\text{weighted out}}(p_w))_{w=1..n} \text{ where}$$

$$536 \quad \text{out}^{\text{weighted out}}(p_w) = \sum_{v=1}^n c_{vw}^{\text{weighted out}} \quad | \quad \forall w = 1..n$$

$$537 \quad \mathbf{OUT}^{\text{weighted in}} = (\text{out}^{\text{weighted in}}(p_w))_{w=1..n} \text{ where}$$

$$538 \quad \text{out}^{\text{weighted in}}(p_w) = \sum_{v=1}^n c_{vw}^{\text{weighted in}} \quad | \quad \forall w = 1..n$$

539

540 Statistical evaluation of the computed effects (first and second order) are performed by  
541 comparing them to the effects of random drawn gene sets (genome-wide randomized  
542 function/trait-gene association) from the genome  $\mathbf{G}$ .

- 543 1. Calculate the network effects for a function/trait  $\mathbf{T}$ .
- 544 2. Draw  $\geq 1000$  random set of genes from the genome  $\mathbf{G}$  with equal size of  $\mathbf{T}$ .
- 545 3. Calculate the first and second order effects for every random set.



Ganglberger et al.  
Functional neuroanatomy from genes

546 4. P-values for the effects of **T** can be computed for every spatial sample position by  
547 performing a t-test against the null-distribution represented by the  $\geq 1000$   
548 random effects since every spatial sample point is normally distributed in the gene  
549 dimension (verified by KS tests).

550 The significance of  $\mathbf{IN}^{\text{weighted out}}$  can be interpreted as nodes that are receiving from primary  
551 expression sites (regions with high **S**), while  $\mathbf{OUT}^{\text{weighted in}}$  shows regions projecting to  
552 primary expression sites. P-value calculations of  $\mathbf{IN}^{\text{weighted in}}$  and  $\mathbf{OUT}^{\text{weighted out}}$  are  
553 numerically equal to the p-value calculation of **S** (for a node degree  $> 0$ ), since for those cases  
554 the sum of incoming and outgoing connections are constant factors when compared to  
555 random effects. We point this out to clarify the p-value calculation of  $\mathbf{IN}^{\text{weighted in}}$  and  
556  $\mathbf{OUT}^{\text{weighted out}}$  can be substituted by **S** for computational reasons.

$$557 \quad \text{in}^{\text{weighted in}}(p_v) = \sum_{w=1}^n s(p_v) * c_{vw} = s(p_v) * \sum_{w=1}^n c_{vw} \quad | \quad \forall v = 1..n$$

$$558 \quad \text{out}^{\text{weighted out}}(p_w) = \sum_{v=1}^n s(p_w) * c_{vw} = s(p_w) * \sum_{v=1}^n c_{vw} \quad | \quad \forall w = 1..n$$

559 Due to the multiple comparison problem, we adjust the FDR of the p-values of the effects by  
560 the Benjamini-Hochberg (13) method. The results in this paper are all significant under a  
561 FDR  $< 5\%$  (if not indicated otherwise).

562 Output is a p-value map (a p-value for every spatial sample point) for every effect. In this  
563 paper, **S**, **IN**, **OUT** are used due to their fast computation, simplicity and biological  
564 significance.

### 565 **Code availability**

566 The code for retrieving data (gene expression, mouse connectome) from the AMBA API  
567 consists of a Matlab script whose single input parameter is a .csv with function/trait  
568 information as a list of gene symbols and Entrez IDs. The main algorithm was implemented  
569 as an R-script that uses the generated files (downloaded data from AMBA) of the Matlab  
570 script to normalize, calculate and carry out a statistical evaluation to generate p-value maps  
571 and structural network visualization for every testcase. The statistical evaluation, which was  
572 randomized because of the extent of the computational task, is parallelized.

573 MATLAB- and R-codes will be made publically available under an open source license for  
574 non-commercial use upon acceptance of the paper for publication.

### 575 **Figure generation**

576 Figures were generated with a R-script that will be provided on request. It uses the p-value  
577 maps of the method to generate slice-views of different effects, heatmaps with statistical  
578 measures of the effects and gene expression, clustered networks, csv-files with raw data and  
579 precision-recall heatmaps (for data with ground truth).

580 Slice-views: Slice-views show 11 maximum intensity projections of 5 sagittal slices each  
581 of a  $132 \times 80 \times 114$  voxel volume (which represents spatial sample positions) that shows  
582 the left hemisphere of the mouse brain. Slice-views are used to visualize a log-scaled  
583 mapping of first order p-values (of **S**), second order incoming node strength **IN** (regions  
584 that are targets of first order regions) and second order **OUT** (regions projecting to first

Ganglberger et al.  
Functional neuroanatomy from genes

585 order regions). At the bottom-right corner is a color-bar, indicating the minus  $\log_{10}$ -  
586 scaled p-values, the threshold for false positive FDR (10% solid line, 5% dotted line).  
587 Slice-views of all testcases can be found in Supplementary Data 3 Case 1-30A, B, C.

588 Heatmaps: Heatmaps in Supplementary Data 3 Case 1-30D and Supplementary Data 4  
589 show the log-scaled p-values of first and second order effects as well as single gene  
590 effects (gene expression density of a gene vs gene expression density of the genome) for  
591 every significant region (a region that has at least one voxel with significant first or  
592 second order effect). The regions are color-coded (on the left side) corresponding to the  
593 AMBA, and given by their acronym on the right side. Similar information can be found  
594 in the attached csv files (Supplementary Data 1) which contain the region-wise p-values  
595 of first and second order effects.

596 Clustered network graphs: We clustered our test sets via hierarchical clustering with  
597 Ward's Criterion (59) using the R function `hclust(*, "ward.D2")`. To ensure that  
598 voxels with similar connections are within the same cluster, they are clustered by their  
599 Pearson-correlation coefficient of their connectivity. To visualize the clusters, we plotted  
600 a sagittally-projected heatmap of their combined p-value (minimum p-value of effects),  
601 surrounded by labels. The connectivity between clusters is shown by the sum of  
602 connectivity (normalized by injection volume) between the clustered regions given as  
603 grey-scale. All graphs can be found in Fig. 2A and Supplementary Data 3 Case 1-30E.

604 F<sub>1</sub>-score bar-chart: Based on available ground truth from the literature (Supplementary  
605 Data 2), we calculated the F<sub>1</sub>-score (45) based on the precision and recall for a binary  
606 classification of ordered p-values. It doesn't take the true negative rate into account,  
607 which is acceptable for the following reason: The literature-based ground truth is region  
608 based. This means we can identify

- 609       ▪ true positives (a positive classified voxel within a region of the ground truth)
- 610       ▪ false positive (a positive classified voxel outside a region of the ground truth)

611 but not

- 612       ▪ true negative (a negative classified voxel outside a region of the ground truth),  
613       since the total set of regions of the functional neuroanatomy are still unknown
- 614       ▪ false negatives (a negative classified voxel within the ground truth), since it is  
615       possible that only a subset of the ground truth region is specific for functional  
616       neuroanatomy.

617 For the calculation of the F<sub>1</sub>-score, respectively precision and recall, the precision is  
618 computed as the ratio of true positive voxels to the amount of positive voxels. For a  
619 voxel-based recall, a false negative rate would be necessary, and so we used the region-  
620 based recall, the ratio of positive classified regions to ground truth regions. We defined a  
621 positive classified region if at least 5% of the voxels of a region is positive (to account for  
622 noise). P-value maps for the F<sub>1</sub>-score bar chart were computed at 200 micron resolution  
623 due to extensive computational network measures.

624

Ganglberger et al.  
Functional neuroanatomy from genes

625 **Technical resources**

626 We used the Amazon elastic cloud computing service with an "r3.8xlarge" instance (32 cores,  
627 244 GB RAM) (60). More than 100 GB RAM is recommended, 40 GB alone to hold the  
628 connectivity matrix in the memory. Additional memory is needed for parallel processing  
629 (approximately 3 GB per core). We tested the R-scripts with 30 cores. The computation uses  
630 about 200 GB Ram and takes between 1 and 2 hours per testcase (depending on the amount  
631 of genes in a set) to calculate the p-values for first and second order effects. The clustering  
632 for the circle-graphs are also parallelized. Depending on the size of the significant areas,  
633 clustering takes between 30 minutes to 3 hours.

634 **General statistics**

635 Unless indicated otherwise, data were tested for normality by Kolmogorov–Smirnov or  
636 D'Agostino & Pearson tests at  $\alpha < 0.05$  and analyzed non-parametrically if tests didn't pass.  
637 Predicted functional neuroanatomy maps were compared to ground truth from fMRI using a  
638 Spearman correlation of the  $-\log_{10}$ -scaled voxel-wise p-value of predicted nodes, set to  
639  $p = 10^{-3}$  for all  $p < 10^{-3}$ , to BOLD heat responses of wt animals or differences in BOLD heat  
640 responses in *Cacna2d3* mutant vs. wt animals, respectively. To compensate for registration  
641 errors between the AMBA reference space and fMRI data, these comparisons were  
642 performed on volumes downsampled to 400  $\mu\text{m}$  spatial resolution.

643 **References**

- 644 56. Hawrylycz MJ, et al. (2012) An anatomically comprehensive atlas of the adult human  
645 brain transcriptome. *Nature* 489(7416):391–9.
- 646 57. Fonov V, et al. (2011) Unbiased average age-appropriate atlases for pediatric studies.  
647 *Neuroimage* 54(1):313–327.
- 648 58. Glasser MF, et al. (2013) The minimal preprocessing pipelines for the Human  
649 Connectome Project. *Neuroimage* 80:105–124.
- 650 59. Murtagh F, Legendre P (2011) Ward's Hierarchical Clustering Method: Clustering  
651 Criterion and Agglomerative Algorithm. *arXiv Prepr arXiv11116285* (June):20.
- 652 60. Amazon EC2 instance types. Available at: <https://aws.amazon.com/ec2/instance-types/>  
653 [Accessed December 6, 2015].  
654

Ganglberger et al.  
Functional neuroanatomy from genes

655 **Supplementary Note 1**

656 Investigating functional and structural brain network data and its analysis is an ongoing  
657 challenge (61). Bullmore and Sporns (61) described the exploration of structural and  
658 functional brain networks as a multi-stage approach, beginning with the separate creation of  
659 structural and functional connectivity matrices based on anatomical parcellations. Network  
660 measures, such as node degree, node strength, hubs, centrality, betweenness etc., indicate  
661 network properties of interest when compared to equivalent measures of a population of  
662 random networks (null-distribution). A local (region-wise) or global (Mantel-test) (62)  
663 comparison reveals functional and structural correspondences of the networks.

664 The integration of genetic information facilitates insight into the influence on neuronal  
665 activity and structural organization of the brain (1). French and Pavlidis (1) compared cortical  
666 and subcortical regions of a rat connectome (63) and AMBA gene expression data (8) using  
667 Spearman's rank correlation to show that brain regions with similar expression patterns have  
668 more similar connectivity profiles. The similarities are close enough that a computational  
669 model by Ji et al (64) could predict structural connectivity by gene expression profiles. 4048  
670 genes with coronal spatial expression data were used as individual features in a sparse model  
671 to obtain a predictive accuracy of 93% on anatomical parcellations. A follow up study proved  
672 that this also works on mesoscale-resolution (voxels at 200 micron resolution) (65).

673 A combined approach of comparing structural connectivity, gene co-expression correlation  
674 and functional networks was investigated by (3). Resting-state fMRI networks (default-mode,  
675 salience, sensorimotor and visuospatial) were used as a starting point to identify functionally  
676 related cortical regions in mice and humans. The strength fraction (scaled node strength of  
677 gene co-expression networks) between those regions was significantly more similar than to  
678 the remaining brain regions (tested by permutation tests). Genes that are related to the four  
679 functional networks were identified by ranking them by their marginal influence on the  
680 strength fraction. A gene co-expression matrix including only top-ranked genes was  
681 compared to structural connectivity using the Mantel procedure (62) and were significant  
682 compared to a sample of 10,000 random gene sets. (2) used Spearman's rank correlation  
683 between node degree of structural connectivity and gene co-expression of gene sets related to  
684 Gene Ontology groups (cellular composition and biological process) to assess how structural  
685 connectivity is genetically driven. Connectivity related Gene Ontology groups were also used  
686 by Fulcher and Fornito (66). They showed that the mean gene co-expression correlation of  
687 groups related to biological processes are higher for connections involving structural "hubs"  
688 (node degree over threshold) vs non-hubs indicates topological specializations of  
689 interregional connections. Structural network hubs were also found to correspond to known  
690 functional networks from the literature (4, 5). Compared to other studies (1–3, 66) which  
691 used node strength or variations of it, Rubinov and Sporns (12) assessed other structural  
692 network parameters, such as community structures, hierarchical modules, high-low cost sub-  
693 networks etc.

694 An overview of related work and its modalities can be found in Supplementary Table 1.  
695 Apart from Fakhry and Ji (65), who used high-resolution prediction, the studies cited were  
696 computed on anatomically parcellated mouse brains (Richiardi and Altmann (3) also used  
697 human data). Our approach was performed on 100-micron grid parcellation. In contrast to  
698 Richiardi and Altmann (3), where functionally related gene sets were products of their  
699 marginal influence on resting-state networks, we used functionally-linked gene sets as the

Ganglberger et al.  
Functional neuroanatomy from genes

700 entry point of our method. Fulcher and Fornito, as well as French et al. (2, 66) showed the  
701 influence of Gene Ontology groups of biological processes on structural networks, while our  
702 approach utilized sets from gene association studies (database-mining, QTL analyses or  
703 SNPs) and that can be directly linked to certain behavioral or mental features. Known  
704 functional networks from the literature confirmed our results as well as the correlation with  
705 resting state fMRI.

706 Comparing gene co-expression correlation to structural connectivity is a common approach  
707 for assessing brain structures with genetic functionality (1–3, 64–66, 4, 5). The novelty in our  
708 paradigm is weighting structural connectivity with functionally related, cumulative gene. It is  
709 not only comparing networks, but it shows the direct effect of functionally related gene  
710 expression on brain anatomy. Those effects were encountered by node strength, which we  
711 proved to be a sufficient indicator, but also with various other network measures.

712

## 713 **Supplementary Note 2**

714 Pain sensation is biomedically one of the most important brain functions. While physiological  
715 sensation is essential to protect the organism and to avoid harm, it is very often a result of  
716 diseases or pathological/abnormal processes when the sensory information does not reflect  
717 the factual danger from the environment. Pain gene sets from mice and human were taken  
718 from literature and databases (Supplementary Data 2) (67, 68). pre-clustered or pre-assigned  
719 to subcategories based on behavioral phenotype (nociception, analgesia, hypersensitivity) or  
720 functional annotations (Gene Ontology (GO)), calcium signaling = calmodulin  
721 binding+calcium ion transport associated genes related to pain processing). For the human  
722 case we chose a metastudy combining SNPs associated with pain sensitivity or we extracted  
723 subcategories (obtained using the DAVID platform based on functional annotation) from the  
724 database for pain-related genes. We also used the Calcium signaling category as a set based  
725 on evolutionary conserved pain genes. Importantly, the effector networks from most of these  
726 gene sets could be linked to known pain-related areas in the brain (46, 48, 69, 70), but also  
727 other regions such as piriform and entorhinal cortices, nucleus accumbens and VTA (Fig.  
728 4A). Functional neuroanatomy maps from these gene sets, and the single gene *Cacna2d3*,  
729 were also compared to fMRI pain responses of wt and mutant animals, respectively (50) (Fig.  
730 3A). The maps derived from the gene sets (except nociception) were similar to the expected  
731 pain network from the mouse fMRI (Fig. 3A). The *Cacna2d3*-dependent maps identified by  
732 our method retraced *Cacna2d3*'s functional genetic effects on pain processing in fMRI in  
733 regions like striatum, olfactory areas, somatosensory cortex, hippocampus, hypothalamus,  
734 paraventricular nucleus of thalamus (PVT) and basal ganglia. Similarly, for the human gene  
735 sets (Fig. 4B), we obtained the brain regions known to be involved in pain processing,  
736 including central grey, PVT, insular and somatosensory cortex, but also VTA – as in the  
737 mouse case – or higher order associative cortices which are responsible for self-awareness  
738 and conscious perception of pain.

739 Fear and anxiety-related genes were retrieved from JAX QTLs database (mouse) or from  
740 literature (mouse and human) (71, 72), pre-assigned to behavioral phenotypes (startle  
741 response, exploration, anxiety, depression and panic disorder). Again, the computed maps  
742 (mouse and human) contained nodes with a fitting functional annotation, like fear-related  
743 regions in the amygdalar complex, prefrontal cortex, thalamic or midbrain structures (73–78).  
744 Moreover, the main nodes detected by our method are in line with their associated functional

Ganglberger et al.  
Functional neuroanatomy from genes

745 subcategory, e.g. startle behavior was linked to insular cortex and PVT, while mental  
746 disorders were linked to insular cortex, ACB and VTA (Fig. 4A). For the panic disorder  
747 category, we can see differences in cortical regions identified for mouse and human. For  
748 example, human data, unlike the mouse, lacks vmPFC, somatosensory or motor cortices,  
749 while we did not detect the visual and auditory cortex in the mouse brain (Fig. 4).

750 For autism-related genes, we retrieved 183 genes implicated in behavioral phenotypes in  
751 mouse models of ASD and 739 autism-associated genes in humans from Autdb database  
752 (79) and clustered the genes with DAVID (80), for further analysis, we chose functional  
753 annotation categories that were the most relevant for ASD modeling: linked to behavior,  
754 cognitive abilities, synaptic functions and cellular level processes. Similar to the other gene  
755 sets, the computationally predicted maps contained nodes related to autistic brain function  
756 (71, 81–88), except parietal cortex for the mouse brain (Fig. 3A) and, in the case of the  
757 human brain the cerebellar areas were not identified.

758 To sum up, we were able to identify most of the known functionally involved brain regions  
759 for all of the investigated categories based on mouse and human data. Additionally, for  
760 different specific subcategories the method identified functionally relevant structures which  
761 were found at the highest positions in rank-order lists. Taking together all the data, the  
762 method can also be a useful tool for identifying novel functional targets, potentially involved  
763 in traits linked to the genetic input. With this, we can bridge already known functional  
764 systems using potential new -still unexplored - connections or even identify new functional  
765 networks. For more detailed information please see Supplementary Data 1, 2, Fig. 3,  
766 Supplementary Data 3 Case 11-30 (for mouse) and Supplementary Data 4 (for human).

Ganglberger et al.  
Functional neuroanatomy from genes

|                                                                                                              | Focus                                                                                                              | Spatial gene co-expression                                                                                                                           | Functional data                                                                                                                                                                                                | Fusing/comparing data with structural connectivity                                                                                                                                                                                                                                                                                 | Quantitative network analysis                                                                                                                                                                                                          |
|--------------------------------------------------------------------------------------------------------------|--------------------------------------------------------------------------------------------------------------------|------------------------------------------------------------------------------------------------------------------------------------------------------|----------------------------------------------------------------------------------------------------------------------------------------------------------------------------------------------------------------|------------------------------------------------------------------------------------------------------------------------------------------------------------------------------------------------------------------------------------------------------------------------------------------------------------------------------------|----------------------------------------------------------------------------------------------------------------------------------------------------------------------------------------------------------------------------------------|
| <b>Predicting functional neuroanatomical maps from fusing brain networks with genetic information</b>        | <p>Mouse, whole brain, voxels at 100-micron resolution</p> <p>Human, whole brain, 415 regions</p>                  | Cumulative effect (trimmed mean co-expression) of gene sets                                                                                          | <p>Functional related gene sets from literature and gene association studies (QTL analyses) + Gene Ontology</p> <p>Known functional networks from the literature</p> <p>Resting-state fMRI (heat response)</p> | <p>Weighting structural/functional connectivity with functionally related, cumulative gene sets to show their effect on the network via network measures</p> <p>Comparing network nodes to known functional networks from the literature and fMRI data</p>                                                                         | <p>Network measures: Node strength, Hub/Authority, Betweenness, Closeness, Eigencentality</p> <p>Comparing network measures of functional weighted networks with empirical null distribution (random-functional weighted networks)</p> |
| <b>(Review) Complex brain networks: graph theoretical analysis of structural and functional systems (61)</b> | various, but especially human                                                                                      | -                                                                                                                                                    | fMRI, electrophysiological techniques (EEG, MEG or MEA)                                                                                                                                                        | Network measures of interest and compare them to equivalent parameters of random networks                                                                                                                                                                                                                                          | various (e.g. node degree, clustering coefficients, motifs, hubs, centrality, modularity)                                                                                                                                              |
| <b>Integrative analysis of the connectivity and gene expression atlases in the mouse brain (64)</b>          | Mouse, whole brain, 301 brain regions                                                                              | <p>4048 genes (with non-zero expression and available as coronal sections)</p> <p>Genes were used as individual features in the prediction model</p> | -                                                                                                                                                                                                              | Using gene co-expression data to predict discretized (binarized by threshold) structural connectivity                                                                                                                                                                                                                              | -                                                                                                                                                                                                                                      |
| <b>High-resolution prediction of mouse brain connectivity using gene expression patterns (65)</b>            | Mouse, whole brain, voxels at 200-micron resolution                                                                | <p>4000 genes (with non-zero expression and available as coronal sections)</p> <p>Genes were used as individual features in the prediction model</p> | -                                                                                                                                                                                                              | Using gene co-expression data to predict discretized (binarized by threshold) structural connectivity                                                                                                                                                                                                                              | -                                                                                                                                                                                                                                      |
| <b>Relationships between gene expression and brain wiring in the adult rodent brain (1)</b>                  | <p>Rat connectome, 142 distinct regions of nearly half the brain volume</p> <p>Mouse, whole brain, 142 regions</p> | Gene expression correlation of 17,530 genes (filtered by unexpressed genes)                                                                          | -                                                                                                                                                                                                              | <p>Spearman's rank Correlation between gene expression and node degree of structural connectivity</p> <p>Mantel correlation of connectivity graph and gene co-expression networks</p> <p>Comparing connectivity between single genes (thresholding the structural connectivity with regions where single genes are expressing)</p> | Node degree of structural connectivity                                                                                                                                                                                                 |

Ganglberger et al.  
Functional neuroanatomy from genes

|                                                                                                                                   |                                                                                                                      |                                                                                                                                                |                                                                                                                     |                                                                                                                                                                                                                                                                                                                                                               |                                                                                                                             |
|-----------------------------------------------------------------------------------------------------------------------------------|----------------------------------------------------------------------------------------------------------------------|------------------------------------------------------------------------------------------------------------------------------------------------|---------------------------------------------------------------------------------------------------------------------|---------------------------------------------------------------------------------------------------------------------------------------------------------------------------------------------------------------------------------------------------------------------------------------------------------------------------------------------------------------|-----------------------------------------------------------------------------------------------------------------------------|
| <p><b>Correlated gene expression supports synchronous activity in brain networks (3)</b></p>                                      | <p>Mouse, 1777 nodes in cortical regions<br/><br/>Human, cortical regions</p>                                        | <p>Pearson<br/>Correlation genome wide</p>                                                                                                     | <p>4 resting-state fMRI networks (default-mode, salience sensorimotor and visuospatial)</p>                         | <p>Compare strength fraction (=network measure) of gene co-expression correlation within/outside functional networks<br/><br/>Marginal influence of each gene on strength fraction<br/><br/>Comparing Mantel correlation of connectivity graph and transcriptional similarity<br/><br/>Comparing Mantel correlation of structural/functional connectivity</p> | <p>Comparing strength fraction (scaled node strength) of gene-co-expression networks inter vs intra functional networks</p> |
| <p><b>Wiring cost and topological participation of the mouse brain connectome (4)</b></p>                                         | <p>Mouse, whole brain, 112 regions</p>                                                                               | <p>Gene expression correlation of 3380 genes (with non-zero expression and available as coronal sections)</p>                                  | <p>Known functional networks from the literature</p>                                                                | <p>Compared hubs to known functional networks from the literature<br/><br/>Compared gene expression profiles (nodal participation) to network hubs</p>                                                                                                                                                                                                        | <p>Network measures: Community structures, hierarchical modules, hubs, high-low cost subnetworks</p>                        |
| <p><b>Adolescence is associated with genomically patterned consolidation of the hubs of the human brain connectomes (5)</b></p>   | <p>Human, 308 cortical regions</p>                                                                                   | <p>Gene expression correlation of 20,737 genes</p>                                                                                             | <p>Gene sets related to synaptic transmission, regulation of glutamatergic signaling and potassium ion channels</p> | <p>Compared gene expression profiles to network hubs, modular community structures and connection distance of structural covariance matrix by correlation</p>                                                                                                                                                                                                 | <p>Network measures: Node degree and Closeness-Centrality</p>                                                               |
| <p><b>Large-Scale Analysis of Gene Expression and Connectivity in the Rodent Brain: Insights through Data Integration (2)</b></p> | <p>Rat connectome, 142 distinct regions of nearly half the brain volume<br/><br/>Mouse, whole brain, 142 regions</p> | <p>Gene expression correlation of gene sets of cell types and biological process division (Gene Ontology) that are related to connectivity</p> | <p>Cell-type enriched gene sets, Gene sets of Gene ontology groups (limited to biological process division)</p>     | <p>Spearman's rank Correlation between gene expression and node degree of structural connectivity of a (cell-type enriched or GO group) gene set compared to empirical-null distribution (resampled gene sets)</p>                                                                                                                                            | <p>Node degree of structural connectivity</p>                                                                               |
| <p><b>A transcriptional signature of hub connectivity in the mouse connectome (66)</b></p>                                        | <p>Mouse, whole brain, 213 brain regions</p>                                                                         | <p>Pearson<br/>Correlation genome wide<br/><br/>Mean co-expression of functional groups of genes</p>                                           | <p>31 distinct functional groups of genes from biological process division (Gene Ontology)</p>                      | <p>Comparing mean gene co-expression correlation of functional groups for structural connections involving hubs vs non-hubs</p>                                                                                                                                                                                                                               | <p>Defining structural "hubs" as nodes with a node degree &gt; k</p>                                                        |

767

768 **Supplementary Table 2:** Outline of related work with focus on the quantitative analysis of networks that are either functional,  
769 structural, derived from gene expression, or a combination thereof.



|        |                                   | MOUSE                                                                                                                         | HUMAN                                                                       |
|--------|-----------------------------------|-------------------------------------------------------------------------------------------------------------------------------|-----------------------------------------------------------------------------|
| Pain   | Meta-study:<br>Database           | Functional classes according to the Pain database (67)                                                                        | Common human genetic variants (89–91) + Functional analysis with DAVID (80) |
|        | Meta-study:<br>literature screen  |                                                                                                                               | SNPs (89)                                                                   |
|        | Experimental<br>data (literature) | Neuronal-specific RNAi knock-down strategy in adult <i>Drosophila</i> (68) + Functional clustering                            |                                                                             |
| Fear   | Meta-study:<br>Database           | Functional classes from JAX database: QTLs (72)                                                                               |                                                                             |
|        | Meta-study:<br>literature screen  | Multidisciplinary integration of human (71, 90) and mouse (71, 91) data                                                       |                                                                             |
| Autism | Meta-study:<br>Database           | Collection of all genes connected to ASD in humans and relevant animal models (AutDB) (79) + Functional analysis (DAVID) (80) |                                                                             |

770 **Supplementary Table 3.** Summary of mouse and human functional genetic data collection.

771 **Supplementary References**

- 772
- 773 61. Bullmore E, Sporns O (2009) Complex brain networks: graph theoretical analysis of  
774 structural and functional systems. *Nat Rev Neurosci* 10(maRcH):186–198.
- 775 62. Mantel N (1967) The detection of disease clustering and a generalized regression  
776 approach. *Cancer Res* 27(2):209–220.
- 777 63. Bota M, Dong H-W, Swanson LW (2005) Brain Architecture Management System.  
778 *Neuroinformatics* 3(1):015–048.
- 779 64. Ji S, Fakhry A, Deng H (2014) Integrative analysis of the connectivity and gene  
780 expression atlases in the mouse brain. *Neuroimage* 84:245–253.
- 781 65. Fakhry A, Ji S (2015) High-resolution prediction of mouse brain connectivity using gene  
782 expression patterns. *Methods* 73(August):71–8.
- 783 66. Fulcher BD, Fornito A (2016) A transcriptional signature of hub connectivity in the mouse  
784 connectome. *Proc Natl Acad Sci U S A*:1513302113–.
- 785 67. LaCroix-Fralish ML, Ledoux JB, Mogil JS (2007) The Pain Genes Database: An  
786 interactive web browser of pain-related transgenic knockout studies. *Pain* 131(1-2).
- 787 68. Neely GG, et al. (2012) Construction of a Global Pain Systems Network Highlights  
788 Phospholipid Signaling as a Regulator of Heat Nociception. *PLoS Genet* 8(12).
- 789 69. Tracey I (2008) Imaging pain. *Br J Anaesth* 101(1):32–39.
- 790 70. Denis D, Marouf R, Rainville P, A B, Nguyen D (2015) Effects of insular stimulation on  
791 thermal nociception. *Eur J Pain*. doi:10.1002/ejp.806.
- 792 71. Santos M, D’Amico D, Dierssen M (2015) From neural to genetic substrates of panic

- 793 disorder: Insights from human and mouse studies. *Eur J Pharmacol* 759:127–141.
- 794 72. Eppig JT, et al. (2015) The Mouse Genome Database (MGD): Facilitating mouse as a  
795 model for human biology and disease. *Nucleic Acids Res* 43(D1):D726–D736.
- 796 73. Katche C, Dorman G, Slipczuk L, Cammarota M, Medina JH (2013) Functional integrity  
797 of the retrosplenial cortex is essential for rapid consolidation and recall of fear memory.  
798 *Learn Mem* 20(4):170–3.
- 799 74. Ferreira TL, Moreira KM, Ikeda DC, Bueno OFA, Oliveira MGM (2003) Effects of dorsal  
800 striatum lesions in tone fear conditioning and contextual fear conditioning. *Brain Res*  
801 987(1):17–24.
- 802 75. Bradfield L a, McNally GP (2010) The role of nucleus accumbens shell in learning about  
803 neutral versus excitatory stimuli during Pavlovian fear conditioning. *Learn Mem*  
804 17(7):337–343.
- 805 76. Garcia R, Vouimba RM, Baudry M, Thompson RF (1999) The amygdala modulates  
806 prefrontal cortex activity relative to conditioned fear. *Nature* 402(6759):294–296.
- 807 77. Schoenbaum G, Chiba a a, Gallagher M (1998) Orbitofrontal cortex and basolateral  
808 amygdala encode expected outcomes during learning. *Nat Neurosci* 1(2):155–159.
- 809 78. Morrison FG, Dias BG, Ressler KJ (2015) Extinction reverses olfactory fear-conditioned  
810 increases in neuron number and glomerular size. *Proc Natl Acad Sci* 112(41):12846–  
811 12851.
- 812 79. Basu SN, Kollu R, Banerjee-Basu S (2009) AutDB: A gene reference resource for autism  
813 research. *Nucleic Acids Res* 37(SUPPL. 1).
- 814 80. Huang DW, Lempicki R a, Sherman BT (2009) Systematic and integrative analysis of  
815 large gene lists using DAVID bioinformatics resources. *Nat Protoc* 4(1):44–57.
- 816 81. Kennedy DP, Adolphs R (2012) The social brain in psychiatric and neurological disorders.  
817 *Trends Cogn Sci* 16(11):559–572.
- 818 82. Critchley HD, et al. (2000) The functional neuroanatomy of social behaviour: changes in  
819 cerebral blood flow when people with autistic disorder process facial expressions. *Brain*  
820 123 ( Pt 1):2203–12.
- 821 83. Sahin M, Sur M (2015) Genes, circuits, and precision therapies for autism and related  
822 neurodevelopmental disorders. *Science (80- )* 350(6263):aab3897–.
- 823 84. Bickart KC, et al. (2014) The amygdala as a hub in brain networks that support social life.  
824 *Neuropsychologia* 63:235–248.
- 825 85. McAlonan GM, et al. (2005) Mapping the brain in autism. A voxel-based MRI study of  
826 volumetric differences and intercorrelations in autism. *Brain* 128(2):268–276.
- 827 86. Zhan Y, et al. (2014) Deficient neuron-microglia signaling results in impaired functional  
828 brain connectivity and social behavior. *Nat Neurosci* 17(3):400–406.
- 829 87. Bourgeron T (2015) From the genetic architecture to synaptic plasticity in autism  
830 spectrum disorder. *Nat Rev Neurosci* 16(9):551–563.
- 831 88. Anomal R, et al. (2015) IMPAIRED PROCESSING IN THE PRIMARY AUDITORY  
832 CORTEX OF AN ANIMAL MODEL OF AUTISM. *Front Syst Neurosci* 9(158).  
833 doi:10.3389/fnsys.2015.00158.
- 834 89. Foulkes T, Wood JN (2008) Pain genes. *PLoS Genet* 4(7).
- 835 90. Hovatta I, Barlow C (2008) Molecular genetics of anxiety in mice and men. *Ann Med*  
836 40(2):92–109.
- 837 91. Barth A, et al. (2014) Analysis of quantitative trait loci in mice suggests a role of *Enoph1*  
838 in stress reactivity. *J Neurochem* 128(6):807–817.
